# Supplementary material for: Ultra-Rare Variants Identify Biological Pathways and Candidate Genes in the Pathobiology of Non-Syndromic Cleft Palate Only
Source: MDPI journal article supplement (doi:10.3390/biom13020236), 2023-01-26

**Figure S4.** Sanger sequencing of the rare damaging variants of GLI3 gene identified by WES. The panel reports chromatograms of probands (right side) and their parents.

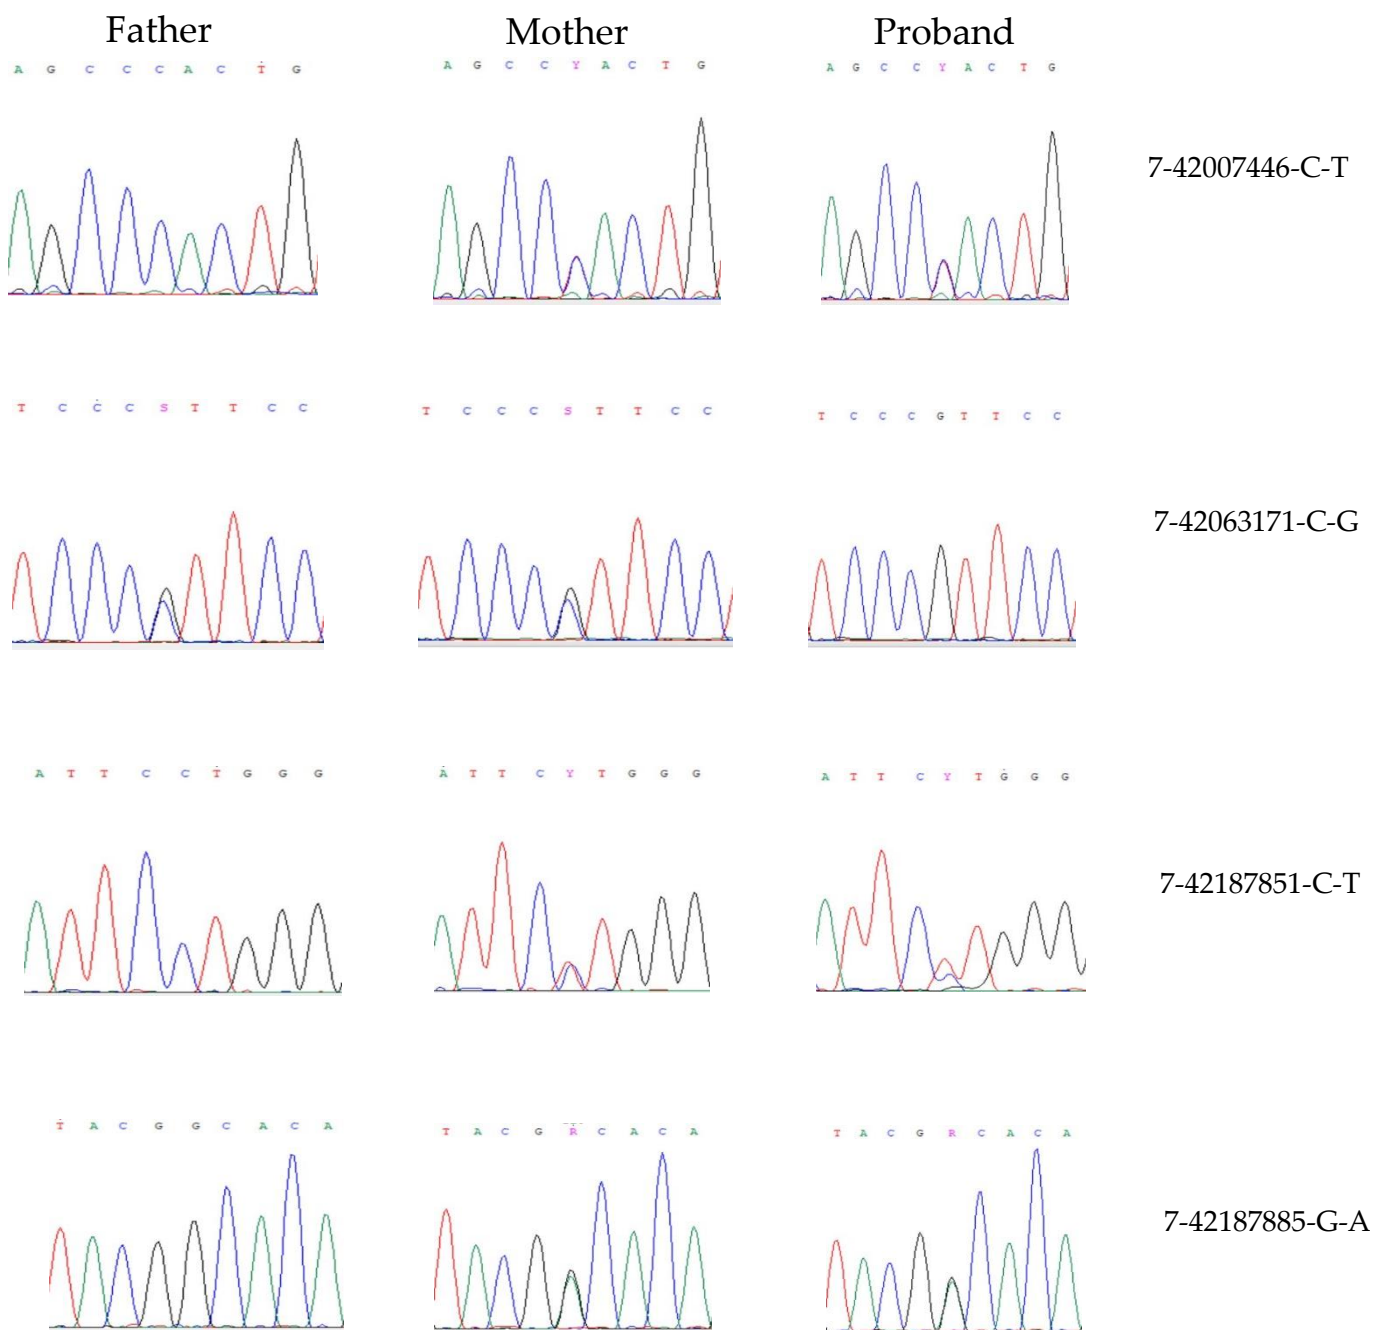

Supplement: s1 [file s1]
