# Supplementary material for: Ultra-Rare Variants Identify Biological Pathways and Candidate Genes in the Pathobiology of Non-Syndromic Cleft Palate Only
Source: Biomolecules. 2023 Jan 26;13(2):236. doi: 10.3390/biom13020236 (PMC9953608; doi:10.3390/biom13020236)
Supplement: Supplementary file 1 [file biomolecules-13-00236-s001.zip › Table S1.xlsx]

## Sheet: Foglio1
Table S1. Sample coverage metrics for cases and controls.
Subject	Mean*	bases_above_10**
case 1	102.17	99.1
case 2	105.38	98.9
case 3	75.17	98.5
case 4	74.13	98.3
case 5	81.21	98.6
case 6	81.25	97.1
case 7	76.26	98.4
case 8	93.53	98.4
case 9	97.26	99.1
case 10	66.59	95.7
case 11	68.19	95.9
case 12	55.25	95.4
case 13	58.07	95.3
case 14	65.23	95.6
case 15	65.28	95.7
case 16	67.27	96
case 17	69.7	95.8
case 18	71.35	96
case 19	40.03	69.7
case 20	64.49	95.7
case 21	62.38	95.3
case 22	62.18	95.6
case 23	60.58	95.8
case 24	63.55	96.1
case 25	62.42	96
case 26	76.49	96.9
case 27	66.33	96.3
case 28	35.29	66.1
case 29	63.09	95.6
case 30	64.19	95.8
case 31	66.38	95.9
case 32	60.38	95.5
case 33	87.18	98.9
case 34	98.16	99
case 35	91.29	98.8
case 36	81.38	98.9
case 37	100.17	99
control 1	161.12	99.1
control 2	127.01	98.8
control 3	128.05	98.9
control 4	136.27	98.8
control 5	127.9	98.9
control 6	126.21	98.8
control 7	124.39	98.8
control 8	167.71	99.1
control 9	156.31	98.8
control 10	112.9	98.7
control 11	150.06	99
control 12	119.09	98.8
control 13	115.07	98.7
control 14	130.39	98.9
control 15	109.35	98.6
control 16	106.3	98.6
control 17	116.08	98.8
control 18	100.5	98.4
control 19	90.9	98.2
control 20	114.33	98.7
control 21	99.38	98.4
control 22	104.25	98.6
control 23	119.41	98.8
control 24	113.35	98.8
control 25	124.59	98.9
control 26	106.17	98.6
control 27	97.46	98.8
control 28	108.23	98.9
control 29	113.21	99
control 30	111.12	98.9
control 31	106	98.9
control 32	124.11	99
control 33	128.07	99
control 34	121.57	99
control 35	102.9	98.9
control 36	126.36	99.1
control 37	122.09	99
control 38	124.9	99
*mean of depth of coverage
**percentage of target bases covered at least 10X
In bold samples not passing the quality check.
