# Supplementary material for: Ultra-Rare Variants Identify Biological Pathways and Candidate Genes in the Pathobiology of Non-Syndromic Cleft Palate Only
Source: Biomolecules. 2023 Jan 26;13(2):236. doi: 10.3390/biom13020236 (PMC9953608; doi:10.3390/biom13020236)
Supplement: Supplementary file 1 [file biomolecules-13-00236-s001.zip › Table S2.xlsx]

## Sheet: Foglio1
Table S2. Summary of homozygous ultra-rare variants in Iranian and Italian cases.
Cohort	CHROM	POS	REF	ALT	Consequence	Allele counts in gnomAD	GENE	in ROH
Iranian	4	139157528	C	T	missense_variant	-	SLC7A11	chr4:113066831-144621839
	22	21741211	C	A	missense_variant	-	RIMBP3B	-
	19	51165451	G	A	missense_variant	-	SHANK1	chr19:51125869-54696167
	17	15522534	T	C	missense_variant	1	CDRT1	-
	11	124740523	T	A	missense_variant	-	ROBO3	-
	11	280662	G	T	missense_variant	-	NLRP6	-
	7	23023580	G	C	missense_variant	-	FAM126A	chr7:17338858-24331351
	20	2442575	T	A	stop_lost	-	SNRPB	chr20:629357-4229585
Italian	7	100483491	C	T	missense_variant	-	SRRT
	19	54486002	C	A	missense_variant	-	CACNG8
	17	39211189	C	G	missense_variant	-	KRTAP2-2
	12	132313049	C	A	missense_variant	-	MMP17
	3	47620114	G	T	missense_variant	-	CSPG5
	20	60982289	C	T	missense_variant	-	CABLES2
	3	148901385	T	C	missense_variant	-	CP
	19	1000792	T	G	missense_variant	-	GRIN3B
	19	1568054	G	A	missense_variant	-	MEX3D
	19	13054760	G	A	missense_variant	-	CALR
	6	32548032	T	G	missense_variant	-	HLA-DRB1
	16	18869552	G	T	missense_variant	-	SMG1
	7	2559508	T	G	missense_variant	-	LFNG
	12	121078834	A	C	missense_variant	-	CABP1
	17	43299504	G	A	missense_variant	-	FMNL1
	15	79057007	G	A	missense_variant	-	ADAMTS7
	12	117349009	C	A	missense_variant	-	FBXW8
	1	1181994	C	T	missense_variant	-	FAM132A
	2	169103894	C	T	missense_variant	-	STK39
CHROM, chromosome; POS, position REF, reference allele, ALT, alternative allele; ROH, runs of homozygosity.
